# Supplementary figures and images for: Specific Monoclonal Antibodies against African Swine Fever Virus Protease pS273R Revealed a Novel and Conserved Antigenic Epitope
Source: Preprints.org preprint supplement (doi:10.20944/preprints202406.0468.v1), 2024-06-10

Figure1

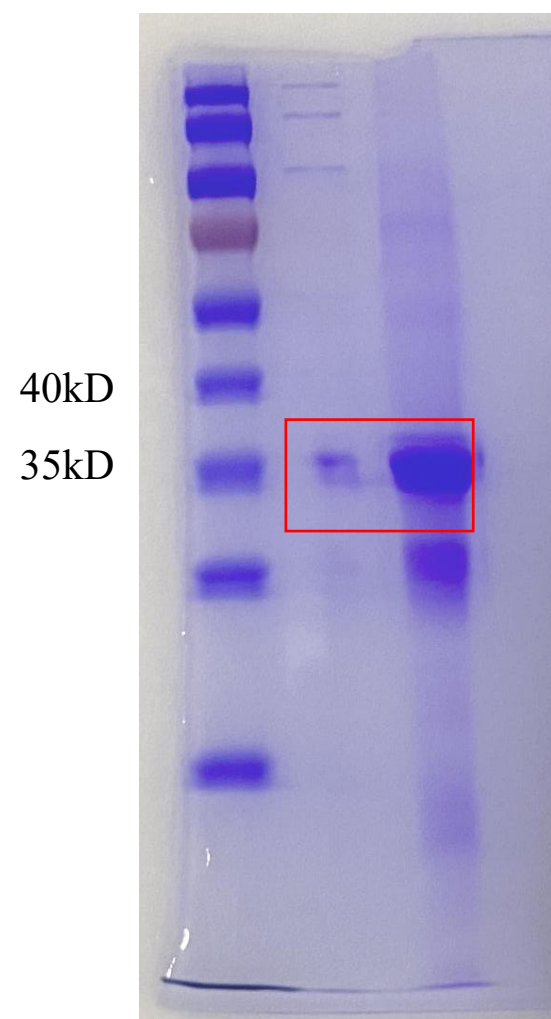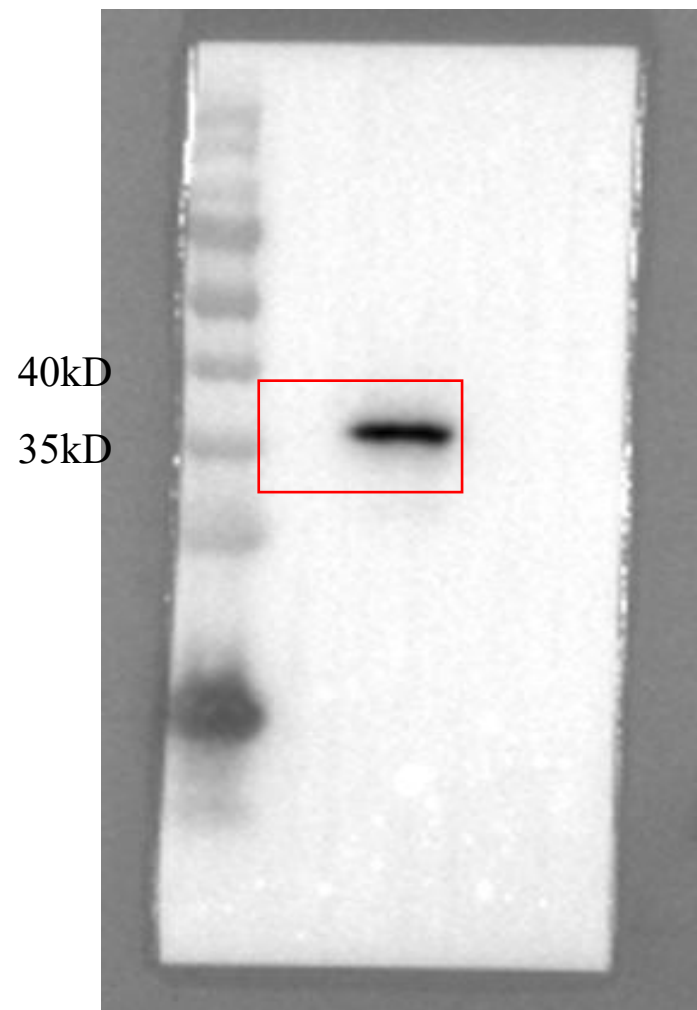

Figure3

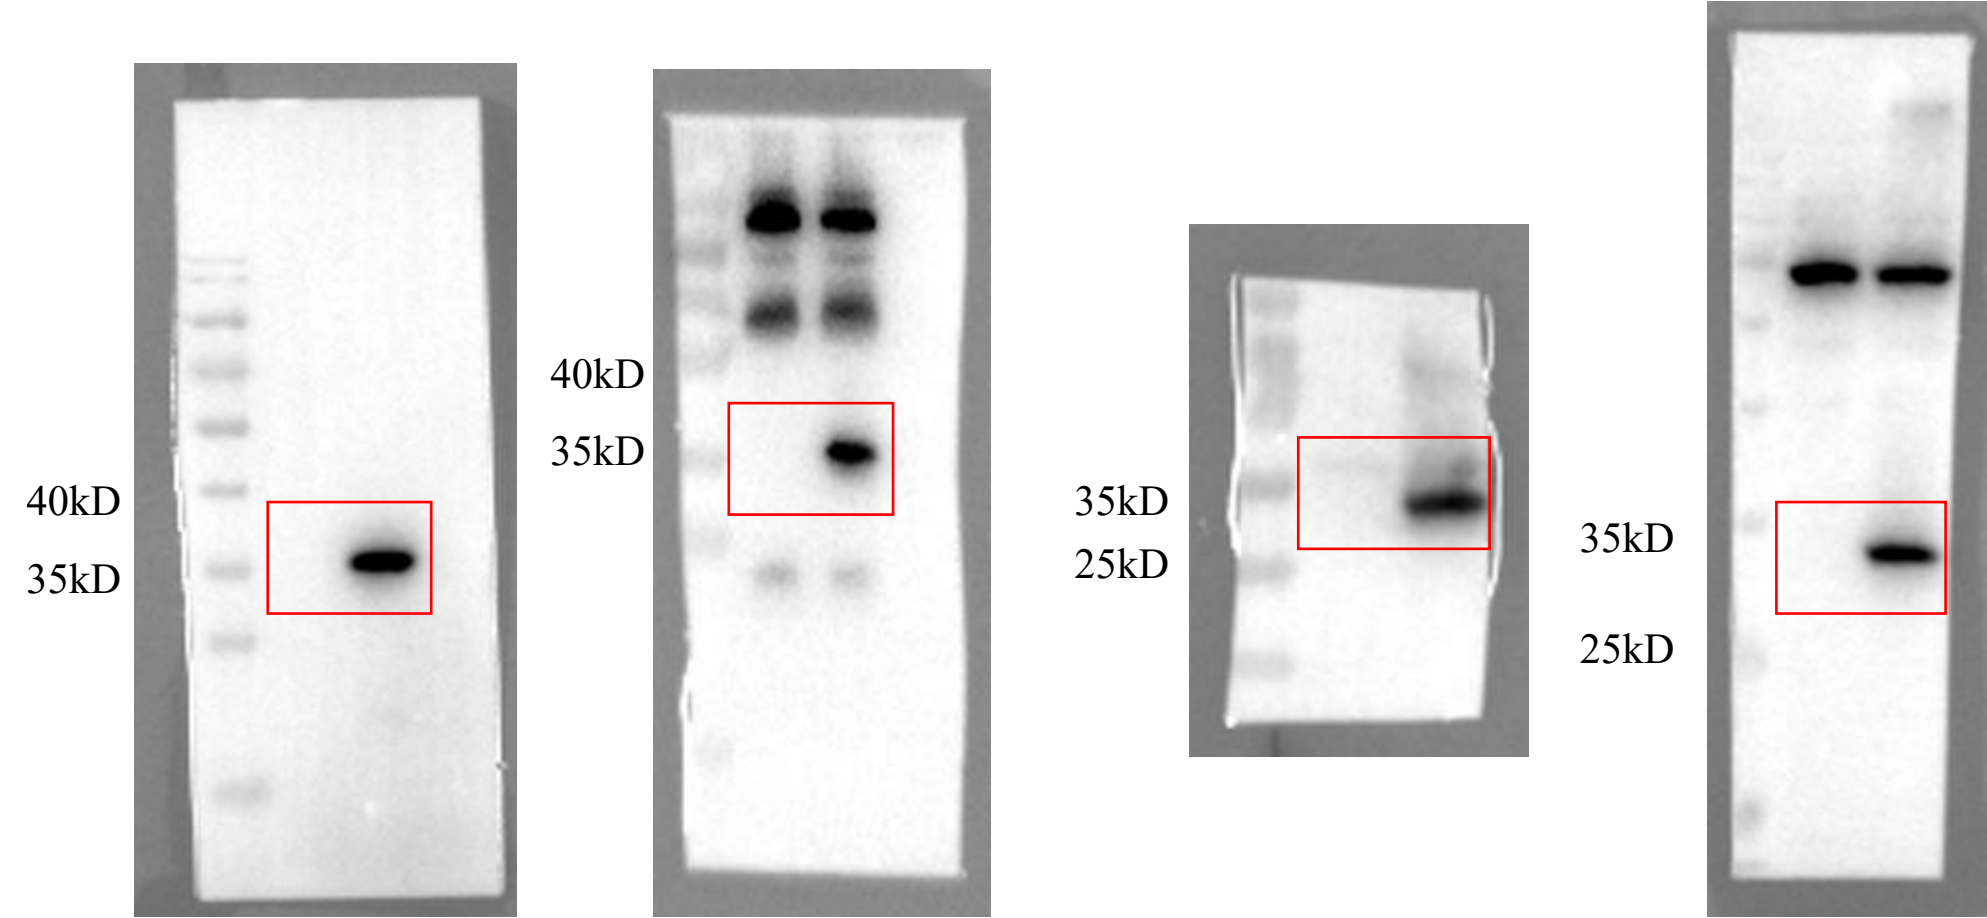

Figure5

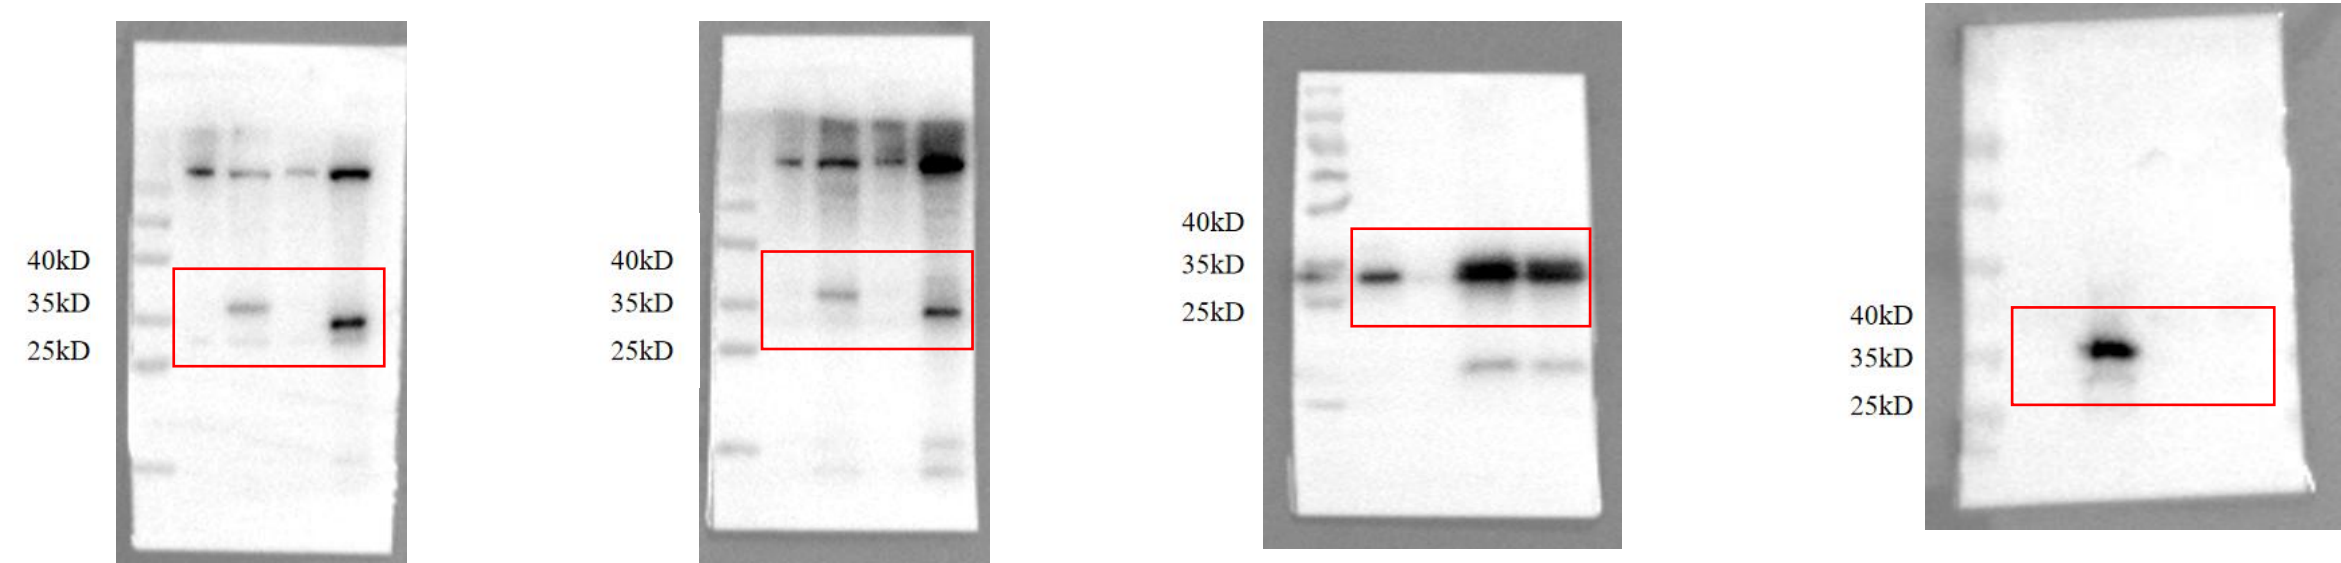

Figure5

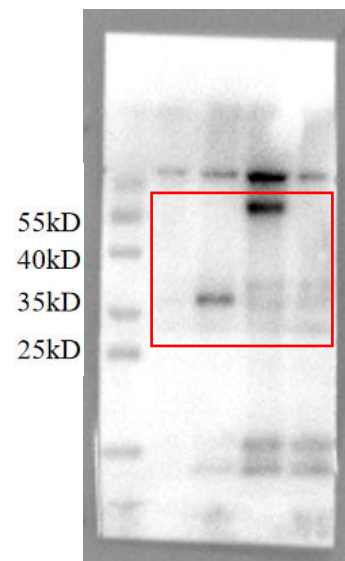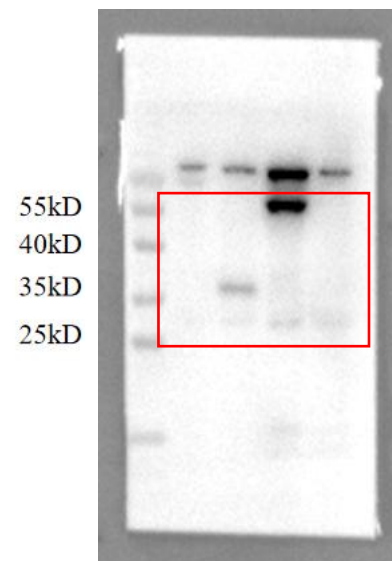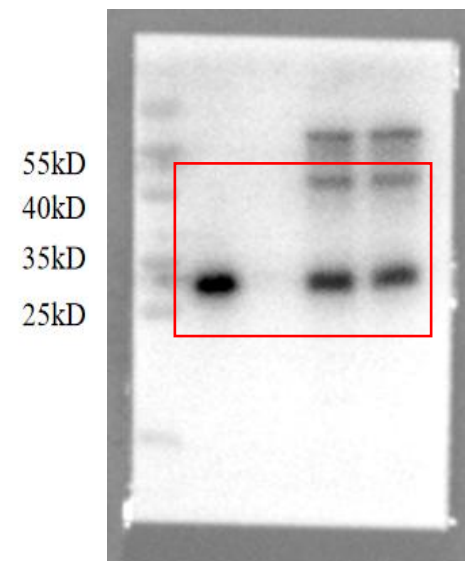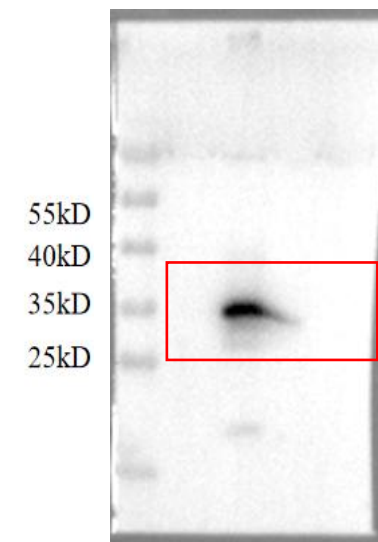

Supplement: Supplementary file 1 [file supplementary]
